# Supplementary material for: Prognostic models based on imaging findings in glioblastoma: Human versus Machine
Source: Sci Rep. 2019 Apr 12;9:5982. doi: 10.1038/s41598-019-42326-3 (PMC6461644; doi:10.1038/s41598-019-42326-3)
Supplement: Supplementary file 1 — Supplementary material [file 41598_2019_42326_MOESM1_ESM.pdf]

# **Prognostic models based on imaging findings in glioblastoma: Human versus Machine**

David Molina-García\* PhD, Luis Vera MSc, Julián Pérez-Beteta MSc, Estanislao Arana<sup>§</sup> MD PhD, Víctor M. Pérez-García<sup>§</sup> PhD.

<sup>§</sup> Joint senior authors

Mathematics (DMG, JPB, VMPG) department, Mathematical Oncology Laboratory (MôLAB), Universidad de Castilla-La Mancha, Ciudad Real, Spain. Research Department (LV), prudsys AG, Berlin, Germany. Radiology (BA) department, Radiology (EA) department, Fundación Instituto Valenciano de Oncología, Valencia, Spain.

## **Supplementary material**

## Section S1

We list here the TCIA patients included in the validation group. From the REMBRANDT database: 900\_00\_5414 and 900\_00\_5458. From the TCGA database: TCGA-02-0034, TCGA-02-0048, TCGA-02-0059, TCGA-02-0060, TCGA-02-0064, TCGA-02-0070, TCGA-02-0075, TCGA-02-0106, TCGA-08-0244, TCGA-08-0348, TCGA-08-0350, TCGA-08-0353, TCGA-08-0354, TCGA-08-0355, TCGA-08-0357, TCGA-08-0358, TCGA-08-0360, TCGA-08-0385, TCGA-08-0389, TCGA-08-0392, TCGA-08-0509, TCGA-08-0510, TCGA-08-0516, TCGA-08-0518, TCGA-08-0521, TCGA-08-0522, TCGA-08-0529, TCGA-12-0616, TCGA-12-0620, TCGA-12-1094, TCGA-12-1098, TCGA-12-1600, TCGA-12-1602, TCGA-12-3646, TCGA-12-3648, TCGA-12-3650, TCGA-14-0817, TCGA-14-1043, TCGA-14-1402, TCGA-14-1454, TCGA-14-1459, TCGA-14-3477, TCGA-14-1825, TCGA-19-0955, TCGA-19-0964, TCGA-19-1385, TCGA-19-1386, TCGA-19-1387, TCGA-19-1389, TCGA-19-1392, TCGA-19-2623, TCGA-19-2625, TCGA-19-2629, TCGA-19-4068, TCGA-19-5951, TCGA-19-5952, TCGA-19-5955, TCGA-19-5958, TCGA-19-5959, TCGA-27-1833, TCGA-27-2523, TCGA-27-2526, TCGA-27-2527, TCGA-76-4928, TCGA-76-4935, TCGA-76-6191, TCGA-76-6193, TCGA-76-6280, TCGA-76-6285, TCGA-76-6656, TCGA-76-6657, TCGA-76-6663. From the IvyGAP database: W10, W11, W12, W13, W16, W18, W2, W20, W21, W29, W33, W34, W36, W38, W39, W40, W48, W5, W7,

## Section S2

This section includes the description of the geometrical (16) and textural (28) measures considered in the study.

### *Geometrical measures considered*

**Volumes:** The contrast enhancing volume ( $V_{CE}$ ), necrotic (or inner) volume ( $V_I$ ) and total volume ( $V = V_{CE} + V_I$ ) were computed. These three measures were considered.

**Contrast enhancing spherical rim width ( $\delta_s$ ):** It was defined as

$$\delta_s = 0.62[\sqrt[3]{(V_{CE} + V_I)} - \sqrt[3]{V_I}]$$

and measures the averaged width of the contrast enhancing areas by assuming sphericity of the necrotic volume and assuming that CE areas are placed peripherally with an annular shape.  $\delta_s$ , its four quartiles, its median, its deviance, its maximum, its minimum and its mode values were considered.

**Surface:** The surface of the segmented tumor was computed using a triangularization based on the surface points and the *marching cube* method [22]. The surface of each connected triangle was computed independently and added for the computation of the total surface.

**Surface regularity:** The surface regularity ( $S_R$ ) is a dimensionless ratio between the segmented tumor volume and the volume that a spherical tumor with the same surface would have.

$$S_R = 6\sqrt{\pi} \frac{Total\ Volume}{\sqrt{(Total\ surface)^3}}$$

This parameter is bounded between 0, ('complex' tumors with very irregular surfaces) and 1 (spherical tumors).

**Maximum 3D tumor diameter ( $d_{max}$  3D):** It was computed as the maximal distance between two points located on the surface of the contrast enhancing tumor and provides the largest longitudinal measure of the tumor. This parameter gives a better size estimate than the frequently used maximal major axis length, based on an orthogonal set of axes.

#### ***Textural measures considered***

**Gradient based features:** the gradient-based measures considered in this study were the spatial energies [A22], which are based on absolute gradients obtained from gray-level variations within the tumor. They are computed as the sum of all the spatial grey-level gradient variations within the segmented tumor. The spatial gray-level gradient is a vector computed on every tumor voxel by computing the differences between the grey-level values of adjacent voxels in 3D. Two different energies were computed. The spatial energy (SE) is independent of the maximum grey-level of the images, as it is normalized by the norm of all the SUV levels within the tumor. The total energy (TE) is normalized by the maximum grey-level present in the images, accounting for the spatial variations of the grey-levels within its range of values. Different energies can be computed by varying the norm with which it is computed, reflecting different physical characteristics. In this work, we used the norms 2, 3, 4, 5, 10 and 50, so obtaining 12 different energies.

**Co-occurrence matrix (CM) features:** the CM describe the arrangements of pairs of elements (voxels) within 2D images [A41,A42]. As it measures only relations between two voxels at a time, it is usually considered to provide information on the local texture of images. The CM was constructed by including the relationships between voxels in all of the 13 possible directions in 3D [A44,A23,28] taking only adjacent voxels. Thus, the

relations with the 26 neighbors of each voxel in 3D were considered. 5 CM-based features were considered in this work (see Table S3).

**Run-length matrix (RLM) features:** the RLM characterizes large areas within the tumor (groups of voxels) to provide information of regional heterogeneity [A40,A43]. Each cell in RLMs (i,j) was computed as the number of runs of length j formed by voxels of intensity in box i in all the 13 possible directions in 3D. 11 RLM-based features were considered in this work (see Table S3).

Table S3 shows the formulae of the textural features considered in this work.

**Table S3 caption.** Definition of the textural features considered in this study. For co-occurrence (CM) measures CM(i,j) stands for the co-occurrence matrix, N is the number of classes of grey-levels taken (16 in this study). For run-length matrix (RLM) measures RLM(i,j) is the run-length matrix, n<sub>r</sub> is the number of runs, N is the number of classes of grey-levels and M is the size in voxels of the largest region found. Regarding the energies, u(x,y,z) denotes the gray-level of the image in the x, y and z axis.

| Type of measure      | Name          | Formula                                                 |
|----------------------|---------------|---------------------------------------------------------|
| Co-occurrence matrix | Entropy       | $-\sum_{i=1}^N \sum_{j=1}^N CM(i,j) \cdot \ln[CM(i,j)]$ |
| Co-occurrence matrix | Homogeneity   | $\sum_{i=1}^N \sum_{j=1}^N \frac{CM(i,j)}{1+(i-j)^2}$   |
| Co-occurrence matrix | Contrast      | $\sum_{i=1}^N \sum_{j=1}^N CM(i,j) \cdot (i-j)^2$       |
| Co-occurrence matrix | Dissimilarity | $\sum_{i=1}^N \sum_{j=1}^N CM(i,j) \cdot  i-j $         |

|                      |                                            |                                                                           |
|----------------------|--------------------------------------------|---------------------------------------------------------------------------|
| Co-occurrence matrix | Uniformity                                 | $\sum_{i=1}^N \sum_{j=1}^N [CM(i, j)]^2$                                  |
| Run-length matrix    | Long Run Emphasis (LRE)                    | $\frac{1}{n_r} \sum_{i=1}^N \sum_{j=1}^M RLM(i, j) \cdot j^2$             |
| Run-length matrix    | Short Run Emphasis (SRE)                   | $\frac{1}{n_r} \sum_{i=1}^N \sum_{j=1}^M \frac{RLM(i, j)}{j^2}$           |
| Run-length matrix    | Low Grey-level Run Emphasis (LGRE)         | $\frac{1}{n_r} \sum_{i=1}^N \sum_{j=1}^M \frac{RLM(i, j)}{i^2}$           |
| Run-length matrix    | High Grey-level Run Emphasis (HGRE)        | $\frac{1}{n_r} \sum_{i=1}^N \sum_{j=1}^M RLM(i, j) \cdot i^2$             |
| Run-length matrix    | Short Run Low Grey-level Emphasis (SRLGE)  | $\frac{1}{n_r} \sum_{i=1}^N \sum_{j=1}^M \frac{RLM(i, j)}{i^2 \cdot j^2}$ |
| Run-length matrix    | Short Run High Grey-level Emphasis (SRHGE) | $\frac{1}{n_r} \sum_{i=1}^N \sum_{j=1}^M \frac{RLM(i, j) \cdot i^2}{j^2}$ |
| Run-length matrix    | Long Run Low Grey-level Emphasis (LRLGE)   | $\frac{1}{n_r} \sum_{i=1}^N \sum_{j=1}^M \frac{RLM(i, j) \cdot j^2}{i^2}$ |
| Run-length matrix    | Long Run High Grey-level Emphasis (LRHGE)  | $\frac{1}{n_r} \sum_{i=1}^N \sum_{j=1}^M RLM(i, j) \cdot i^2 \cdot j^2$   |
| Run-length matrix    | Grey-Level Non-Uniformity (GLNU)           | $\frac{1}{n_r} \sum_{i=1}^N \left( \sum_{j=1}^M RLM(i, j) \right)^2$      |
| Run-length matrix    | Run-Length Non-Uniformity (RLNU)           | $\frac{1}{n_r} \sum_{j=1}^M \left( \sum_{i=1}^N RLM(i, j) \right)^2$      |

|                   |                         |                                                                                                                                                                                                                            |
|-------------------|-------------------------|----------------------------------------------------------------------------------------------------------------------------------------------------------------------------------------------------------------------------|
| Run-length matrix | Run Percentage (RPC)    | $\frac{n_r}{\sum_{i=1}^N \sum_{j=1}^M RLM(i, j) \cdot j}$                                                                                                                                                                  |
| Spatial energy    | Spatial energy (norm p) | $\frac{\left( \int_z \int_y \int_x  \nabla u(x, y, z) ^p \Delta x \Delta y \Delta z dx dy dz \right)^{\frac{1}{p}}}{\left( \int_z \int_y \int_x  u(x, y, z) ^p \Delta x \Delta y \Delta z dx dy dz \right)^{\frac{1}{p}}}$ |
| Total energy      | Total energy (norm p)   | $\frac{\left( \int_z \int_y \int_x  \nabla u(x, y, z) ^p \Delta x \Delta y \Delta z dx dy dz \right)^{\frac{1}{p}}}{\max_{x,y,z} u(x, y, z)}$                                                                              |

**Table S4 caption.** Feature importance ranking of the cross-validation-based feature selection algorithm with regression trees

| PARAMETER               | SCORE       | IMPORTANCE RANKING |
|-------------------------|-------------|--------------------|
| Age                     | 1163,019194 | 1                  |
| Surface regularity      | 76,29299    | 2                  |
| RLM16-LGRE              | 72,80527    | 3                  |
| RLM16-HGRE              | 65,440498   | 4                  |
| RLM16-SRHGE             | 62,068569   | 5                  |
| Geometric irregularity  | 61,718005   | 6                  |
| RLM16-SRLGE             | 59,993552   | 7                  |
| CE rim width            | 45,871033   | 8                  |
| CM16-UNI                | 43,321344   | 9                  |
| CE volume               | 42,671811   | 10                 |
| RLM16-RLNU              | 41,345162   | 11                 |
| Max CE rim width        | 40,595562   | 12                 |
| Q4 CE rim width         | 40,082047   | 13                 |
| RLM16-RPC               | 37,486504   | 14                 |
| CM16-ELN                | 35,379336   | 15                 |
| Geometric heterogeneity | 33,523982   | 16                 |
| Total Surface           | 33,5196     | 17                 |
| Max diameter            | 32,102192   | 18                 |
| Total Volume            | 31,105335   | 19                 |
| EE-2                    | 25,759104   | 20                 |
| Q3 CE rim width         | 25,225233   | 21                 |
| ET-3                    | 24,952074   | 22                 |
| ET-2                    | 24,695739   | 23                 |
| EE-4                    | 24,582027   | 24                 |
| EE-3                    | 24,368386   | 25                 |
| Necrotic volume         | 24,13397    | 26                 |
| CM16-HOM                | 24,043498   | 27                 |
| ET-50                   | 22,923418   | 28                 |
| RLM16-SER               | 22,66601    | 29                 |
| Q2 CE rim width         | 22,259601   | 30                 |
| CM16-COM                | 22,177305   | 31                 |
| ET-4                    | 22,077553   | 32                 |
| EE-50                   | 21,768281   | 33                 |
| RLM16-GLNU              | 21,655624   | 34                 |
| EE-5                    | 21,403812   | 35                 |
| Mean CE rim width       | 21,01395    | 36                 |
| CM16-DIS                | 20,030934   | 37                 |
| Q1 CE rim width         | 19,634771   | 38                 |
| ET-5                    | 19,520535   | 39                 |
| Mode CE rim width       | 18,464428   | 40                 |
| ET-10                   | 18,31009    | 41                 |
| RLM16-LRHGE             | 15,34957    | 42                 |
| EE-10                   | 12,848465   | 43                 |
| RLM16-LRE               | 8,191706    | 44                 |
| RLM16-LRLGE             | 5,601929    | 45                 |

**Table S5 caption.** Feature scores per component and explained variance after Principal Component Analysis (PCA). Scores higher than 0.1 are in red and those lower than -0.1 are in blue.

|                        | Comp.        | Comp.       | Comp.        | Comp.       | Comp.       | Comp.       | Comp.        | Comp.        |
|------------------------|--------------|-------------|--------------|-------------|-------------|-------------|--------------|--------------|
| <b>Survival</b>        | <b>-0,03</b> | <b>0,00</b> | <b>-0,04</b> | <b>0,02</b> | <b>0,00</b> | <b>0,36</b> | <b>-0,01</b> | <b>-0,40</b> |
| Age                    | 0,01         | -0,03       | 0,00         | 0,09        | -0,03       | -0,32       | 0,02         | 0,50         |
| Necrotic volume        | 0,05         | 0,23        | -0,10        | -0,21       | 0,11        | 0,19        | -0,07        | 0,04         |
| CE volume              | 0,01         | 0,28        | 0,10         | -0,08       | 0,10        | -0,11       | -0,14        | 0,03         |
| CE rim width           | -0,05        | 0,14        | 0,26         | 0,14        | -0,01       | -0,20       | -0,06        | -0,01        |
| Max CE rim width       | 0,01         | 0,21        | 0,22         | -0,02       | 0,03        | 0,05        | -0,16        | -0,12        |
| Max diameter           | 0,04         | 0,28        | 0,03         | -0,13       | 0,11        | -0,15       | -0,09        | -0,09        |
| Q1 CE rim width        | -0,07        | 0,03        | 0,31         | 0,07        | -0,08       | 0,20        | 0,07         | 0,05         |
| Q2 CE rim width        | -0,07        | 0,05        | 0,33         | 0,13        | -0,06       | 0,11        | 0,01         | 0,00         |
| Q3 CE rim width        | -0,06        | 0,07        | 0,33         | 0,14        | -0,04       | 0,06        | -0,05        | -0,04        |
| Q4 CE rim width        | 0,01         | 0,21        | 0,22         | -0,02       | 0,03        | 0,05        | -0,16        | -0,12        |
| Mean CE rim width      | -0,07        | 0,06        | 0,33         | 0,12        | -0,05       | 0,10        | -0,01        | -0,02        |
| Mode CE rim width      | -0,06        | 0,05        | 0,30         | 0,11        | -0,05       | 0,12        | 0,09         | 0,07         |
| Geometric              | 0,09         | 0,16        | -0,16        | -0,18       | 0,09        | -0,05       | -0,13        | -0,15        |
| Geometric irregularity | -0,06        | -0,05       | 0,19         | 0,24        | -0,02       | -0,15       | -0,04        | -0,03        |
| Total Volume           | 0,04         | 0,29        | 0,00         | -0,16       | 0,12        | 0,04        | -0,12        | 0,04         |
| Total Surface          | 0,04         | 0,29        | 0,02         | -0,13       | 0,11        | -0,12       | -0,11        | -0,01        |
| Surface regularity     | -0,03        | -0,12       | -0,07        | -0,03       | 0,00        | 0,55        | 0,09         | 0,13         |
| EE-2                   | 0,25         | -0,03       | -0,05        | 0,15        | 0,06        | 0,05        | -0,15        | 0,00         |
| EE-3                   | 0,25         | -0,02       | -0,06        | 0,17        | 0,06        | 0,04        | -0,15        | -0,02        |
| EE-4                   | 0,25         | -0,02       | -0,05        | 0,18        | 0,06        | 0,03        | -0,15        | -0,03        |
| EE-5                   | 0,25         | -0,02       | -0,05        | 0,20        | 0,06        | 0,02        | -0,15        | -0,04        |
| EE-10                  | 0,24         | 0,00        | -0,04        | 0,23        | 0,06        | -0,02       | -0,13        | -0,05        |
| EE-50                  | 0,23         | -0,01       | 0,00         | 0,23        | 0,05        | -0,03       | -0,05        | -0,02        |
| ET-2                   | 0,23         | 0,12        | 0,06         | -0,07       | -0,01       | 0,02        | 0,33         | 0,06         |
| ET-3                   | 0,25         | 0,09        | 0,06         | -0,03       | -0,01       | 0,03        | 0,27         | 0,05         |
| ET-4                   | 0,27         | 0,07        | 0,05         | 0,01        | -0,01       | 0,04        | 0,23         | 0,03         |
| ET-5                   | 0,27         | 0,05        | 0,04         | 0,04        | -0,01       | 0,04        | 0,19         | 0,02         |
| ET-10                  | 0,27         | 0,01        | 0,02         | 0,15        | 0,01        | 0,02        | 0,07         | -0,01        |
| ET-50                  | 0,24         | -0,01       | 0,01         | 0,22        | 0,04        | -0,02       | -0,03        | -0,02        |
| RLM16-SER              | 0,09         | -0,06       | 0,09         | -0,25       | 0,03        | 0,07        | -0,14        | -0,13        |
| RLM16-LRE              | -0,06        | 0,24        | -0,10        | 0,08        | 0,00        | 0,17        | -0,17        | 0,33         |
| RLM16-LGRE             | 0,12         | 0,09        | -0,05        | -0,07       | -0,43       | 0,01        | -0,16        | -0,09        |
| RLM16-HGRE             | -0,05        | -0,11       | 0,06         | 0,02        | 0,48        | 0,12        | -0,04        | 0,03         |
| RLM16-SRLGE            | 0,12         | 0,08        | -0,05        | -0,08       | -0,42       | 0,02        | -0,20        | -0,11        |
| RLM16-SRHGE            | -0,01        | -0,12       | 0,08         | -0,05       | 0,47        | 0,12        | -0,09        | -0,01        |
| RLM16-LRLGE            | 0,00         | 0,15        | -0,10        | 0,08        | -0,06       | 0,29        | -0,20        | 0,37         |
| RLM16-LRHGE            | -0,09        | 0,22        | -0,04        | 0,07        | 0,11        | -0,02       | -0,05        | 0,29         |
| RLM16-GLNU             | 0,16         | 0,18        | 0,07         | -0,16       | 0,01        | 0,01        | 0,31         | 0,03         |
| RLM16-RLNU             | 0,18         | 0,10        | 0,11         | -0,22       | 0,07        | -0,01       | 0,29         | 0,03         |
| RLM16-RPC              | 0,12         | -0,16       | 0,14         | -0,20       | -0,15       | 0,04        | -0,17        | 0,18         |
| CM16-ELN               | 0,14         | -0,18       | 0,16         | -0,21       | 0,07        | -0,02       | -0,11        | 0,03         |
| CM16-HOM               | -0,13        | 0,22        | -0,16        | 0,17        | -0,02       | 0,04        | 0,17         | -0,07        |
| CM16-COM               | 0,13         | -0,17       | 0,15         | -0,22       | -0,09       | 0,08        | -0,13        | 0,22         |
| CM16-DIS               | 0,14         | -0,20       | 0,16         | -0,21       | -0,05       | 0,03        | -0,15        | 0,15         |
| CM16-UNI               | -0,08        | 0,19        | -0,15        | 0,14        | -0,11       | 0,24        | 0,08         | 0,07         |
| <b>EXPLAINED</b>       | <b>11,93</b> | <b>8,93</b> | <b>7,16</b>  | <b>3,78</b> | <b>3,05</b> | <b>1,60</b> | <b>1,47</b>  | <b>1,29</b>  |
